1 **Title Page:**

2 **Elevated serum adenosine deaminase levels in neuroleptic-naïve patients with recent-**  
3 **onset schizophrenia**

4 Arun Sasidharan<sup>a,b,1</sup>, Sunil Kumar<sup>b,c</sup>, John P John<sup>b,c,d,\*</sup>, Mariamma Philip<sup>e</sup>, Sarada  
5 Subramanian<sup>f</sup>, Sanjeev Jain<sup>c,g</sup>, Bindu M Kutty<sup>a</sup>

6 <sup>a</sup>Department of Neurophysiology,

7 <sup>b</sup>Multimodal Brain Image Analysis Laboratory (MBIAL),

8 <sup>c</sup>Department of Psychiatry,

9 <sup>d</sup>Department of Clinical Neuroscience,

10 <sup>e</sup>Department of Biostatistics,

11 <sup>f</sup>Department of Neurochemistry,

12 <sup>g</sup>Molecular Genetics Laboratory,

13 National Institute of Mental Health and Neuro Sciences (NIMHANS), Bengaluru, India.

14

15 <sup>1</sup>Current affiliation: Axxonet System Technologies Pvt. Ltd., Bengaluru, India.

16

17 \*Corresponding author:

18 Multi-Modal Brain Image Analysis Laboratory (MBIAL),

19 Neurobiology Research Centre,

20 National Institute of Mental Health and Neuro Sciences (NIMHANS),

21 Hosur Road, Bengaluru-560029,

22 Karnataka, India.

23 Tel: +91-80-2699-5329; Fax: +91-80-2656-4822

24 Email: [jpjnimhans@gmail.com](mailto:jpjnimhans@gmail.com)

25 [jpj@nimhans.ac.in](mailto:jpj@nimhans.ac.in)

26

27

28

29

30 **Abstract**

31 Schizophrenia is characterized by pathophysiological alterations of multiple neurotransmitter  
32 systems such as dopaminergic, glutamatergic, GABA-ergic and serotonergic pathways.  
33 Adenosine, a homeostatic neuromodulator that mediates signaling through multiple  
34 neurotransmitter pathways, is an emerging candidate neurobiological substrate of  
35 schizophrenia. The present study examined peripheral blood levels of adenosine deaminase,  
36 an adenosine metabolizing enzyme, in 16 neuroleptic-naïve patients with recent-onset  
37 schizophrenia (mean age = 25.59 years (range: 16-35)) and 18 age-matched healthy  
38 comparison subjects (mean age = 25.17 years (range: 18-28)). Serum adenosine deaminase  
39 levels were assayed at two time points; before (7 p.m.) and after (7 a.m.) sleep. The  
40 adenosine deaminase levels were compared between groups and were correlated to positive  
41 and negative symptom severity measures. Adenosine deaminase levels were found to be  
42 higher at both evening ( $p=0.013$ ) and morning ( $p<0.001$ ) time points in our sample of  
43 patients with recent-onset schizophrenia who were never exposed to neuroleptic medications.  
44 Correlational analysis revealed evidence for a possible link between evening rise in adenosine  
45 deaminase and severity of auditory hallucinations ( $p=0.003$ ) as well as morning rise in  
46 adenosine deaminase and severity of avolition-apathy in patients with schizophrenia  
47 ( $p=0.013$ ). The results of the study provide strong support to the adenosine hypothesis of  
48 schizophrenia and highlight the potential utility of serum adenosine deaminase as a peripheral  
49 biomarker of schizophrenia.

50 **Keywords:**

51 Schizophrenia; adenosine deaminase; neuroleptic-naïve; hallucination; avolition

52

## 53 **1. Introduction**

54 The pathophysiology of schizophrenia is understood to involve dysfunction of the  
55 dopaminergic (Carlsson, 1988), serotonergic (Meltzer and Massey, 2011), glutamatergic  
56 (Coyle, 2006) and GABA-ergic (Gonzalez-Burgos and Lewis, 2008) neurotransmitter  
57 systems. The diverse psychopathology of schizophrenia cannot be explained by dysfunction  
58 of neurotransmitter systems when considered in isolation (Keshavan et al., 2011). Adenosine,  
59 a homeostatic neuromodulator, is an emerging candidate neurobiological substrate with  
60 effects on multiple neurotransmitter pathways (Boison, 2008; Cunha and Cunha, 2001). In  
61 addition, adenosine plays an important role in early brain development and regulation of  
62 brain immune responses (Cunha and Cunha, 2001), and thereby could also contribute to the  
63 neurodevelopmental deviations implicated in schizophrenia (Lara et al., 2006).

64 Adenosine deaminase (ADA) is a purine-inactivating endoenzyme that irreversibly  
65 deaminates adenosine to inosine (Yegutkin, 2008), leading to its final degradation to uric  
66 acid. Like adenosine, ADA too is ubiquitously found in the human body (Franco et al., 1997)  
67 and hence implicated in diverse physiological functions. Thus, serum ADA level has been  
68 suggested as an important peripheral biomarker of adenosine signaling in neuropsychiatric  
69 disorders (Elgün et al., 1999; Herken et al., 2007; Stubbs et al., 1982) especially in  
70 schizophrenia, given that a hypoadenosinergic state has been linked to its pathogenesis (Lara  
71 et al., 2006).

72 In support of the above, Dutra et al. (Dutra et al., 2010) demonstrated lower frequency of  
73 occurrence of an ADA variant with decreased enzymatic activity (G/A genotype) among  
74 patients with schizophrenia, suggesting increased levels of ADA and reduced levels of  
75 ambient adenosine. Another study reported significantly higher serum ADA in patients with  
76 schizophrenia on antipsychotic monotherapy (more so with atypical antipsychotic), when  
77 compared to healthy control subjects (Brunstein et al., 2007), but found no correlation with  
78 clinical psychopathology. However, Ghaleiha et al. (Ghaleiha et al., 2011), reported that in  
79 patients with chronic schizophrenia, antipsychotic therapy (particularly with clozapine) was  
80 associated with an increase in serum ADA and symptomatic improvement. Therefore, it is  
81 unclear whether the increased serum ADA reported in the above studies was the consequence  
82 of treatment with antipsychotics or a marker of the disorder per se.

83 Therefore, we examined whether serum ADA levels were significantly different in patients  
84 with schizophrenia who have never been exposed to antipsychotic medications in comparison  
85 to matched healthy comparison subjects. In accordance with the proposed adenosine theory  
86 of schizophrenia pathophysiology, we hypothesized that the serum ADA will be significantly  
87 higher in patients with schizophrenia. We also aimed at exploring the hitherto unreported  
88 relationship between serum ADA and symptom severity scores.

## 89 **2. Materials and Methods**

90 The study was carried out at the National Institute of Mental Health and Neurosciences  
91 (NIMHANS), Bangalore, India, with due approval from the Institute Ethics Committee thus  
92 conforming to the ethical standards laid down in the 1964 Declaration of Helsinki. Written  
93 informed consent was obtained from all the participants prior to enrolment into the study.

## 94 **2.1. Participants**

95 20 patients with schizophrenia (SZ) or schizophreniform disorder and 20 age-matched  
96 healthy comparison subjects (HS) participated in the study. Of the above subjects, the blood  
97 samples of four SZ and two HS were of inadequate quantity and/or poor quality, and  
98 therefore had to be omitted from the study. The remaining participants (SZ=16; HS=18) were  
99 of similar age group (SZ: mean=25.59 years (range: 16-35); HS: mean =25.17 years (range:  
100 18-28)). Patients with schizophrenia/schizophreniform disorder had a mean illness duration  
101 of 21 months (range: 1-96). Of these, 11 SZ and 17 HS had ADA samples collected at two  
102 time points, i.e., at 7p.m. on day1 and 7a.m. on day2. Five SZ had only their morning  
103 samples collected, since they did not abstain from consuming food for 3 hours prior to the  
104 evening sample collection. The sample collection could not be rescheduled to the next day for  
105 ethical reasons, since the patients were neuroleptic naïve and had to be started on medications  
106 at the earliest. In one of the healthy subjects also, the morning sample alone could be  
107 collected due to certain logistic constraints.

108 The diagnosis of schizophrenia/schizophreniform disorder was arrived at using criteria from  
109 the Diagnostic and Statistical Manual for Mental Disorders – Fourth Edition (DSM-IV)  
110 (American Psychiatric Association, 2000) based on the consensus of a research psychiatrist  
111 who conducted a semi-structured interview and a trained research assistant who used the  
112 Mini International Neuropsychiatric Interview (MINI) for DSM-IV (Sheehan et al., 1998).  
113 Positive and negative symptoms were rated using the Scale for Assessment of Positive  
114 symptoms (SAPS) (Andreasen, 1983) and Scale for Assessment of Negative symptoms  
115 (SANS) (Andreasen, 1982) respectively by one rater (S.K.) for all subjects after undergoing  
116 adequate training and establishment of inter-rater reliability. None of the patients had history  
117 of exposure to neuroleptic medications.

118 The healthy comparison subjects were recruited from the community through word-of-mouth.  
119 They were screened to exclude past history of Axis I psychiatric disorders, personal history  
120 of psychoactive medication use and family history of schizophrenia spectrum disorders in  
121 first-degree relatives using a study-specific proforma.

122 All participants were screened to exclude history of significant head injury, neurological  
123 disorders, medical conditions including acute infections, autoimmune disorders, endocrine  
124 disorders, specific sleep disorders, and substance abuse including caffeine (daily intake of  
125 caffeine-containing beverages and food substances exceeding 300mg/day). All were free of  
126 any drugs known to affect immune or endocrine function. All participants underwent clinical  
127 screening to rule out any unstable medical conditions. The participants were instructed to  
128 avoid food and caffeine for at least 3 hours before the evening blood sample, following which  
129 they had their dinner; overnight fasting was ensured before drawing the morning blood  
130 sample. The above precautionary measures were adopted to avoid any confounding effects,  
131 including that of food and caffeine on the measured ADA levels.

## 132 **2.2. Measurement of ADA**

133 Blood samples were collected from participants before and after their sleep as there was no  
134 available evidence from the literature regarding the most appropriate time to collect serum for  
135 ADA assay. The first sample was collected around 7p.m. (before dinner and before sleep)

136 similar to a previous schizophrenia study (Brunstein et al., 2007) and the second sample  
137 around 7a.m. the following morning (after sleep and before breakfast) similar to earlier  
138 studies in major depression (Elgün et al., 1999; Herken et al., 2007). The participants slept in  
139 the sleep cabin of the Sleep Research Laboratory at the Department of Neurophysiology. 5ml  
140 of venous blood samples were collected in vacuum tubes (BD Vacutainer®) without  
141 anticoagulants on both occasions. The 7p.m. samples were allowed to clot overnight at  
142 4°Celsius whereas the 7a.m. samples were allowed to clot at room temperature for two hours.  
143 Later both the samples were centrifuged for 10 minutes at 4000rpm to extract the serum. The  
144 serum samples were then coded and stored in microtubes (Eppendorf Inc.) at -80°Celsius for  
145 the assay.

146 The ADA assay from serum was performed using a previously validated (Al-Rubaye and  
147 Morad, 2012, 2013) colorimetric sandwich-enzyme immunoassay kit E91390Hu96 (USCN  
148 Life Science Inc., Wuhan), following the instructions provided in the manual (“SEB390Hu-  
149 96 ELISA Kit for Adenosine Deaminase (ADA) - Instruction manual,” 2012). All samples  
150 were analyzed in duplicate and the intra-assay variability was less than 10%. Assays were  
151 conducted at the Department of Neurochemistry under the supervision of S.S. The trained  
152 neurochemist who carried out the assays was blinded to the study group status of the blood  
153 samples.

### 154 **2.3. Genotyping of ADA polymorphism**

155 The ADA 22G>A polymorphism (rs73598374) was genotyped using allele-specific  
156 polymerase-chain reaction under the supervision of M.P and S.J. Genotyping was done for 32  
157 (HS=16; SZ=16) out of the 35 subjects, all of whom were found to have the G/G genotype.  
158 Therefore, any further examination of the relationship between the ADA rs73598374  
159 genotypes and serum ADA levels and the differences between patients with schizophrenia  
160 and healthy comparison subjects was not possible in our limited sample.

### 161 **2.4. Statistical analysis**

162 Statistical analysis was performed using GraphPad Prism 5.0 (GraphPad Software, Inc.) and  
163 Statistical Toolbox of MATLAB 2012b (Mathworks, USA). D'Agostino and Pearson  
164 omnibus test and visual inspection of histogram plot was used to determine the normality of  
165 data distribution. As ADA levels of both groups did not follow normal distribution, statistical  
166 analyses were done on their log transformed values which followed a normal distribution. All  
167 other values, except age, followed normal distribution. Mann–Whitney U-test was used to  
168 test the group difference in age. Between-group comparisons for ADA levels of the 7p.m.  
169 ( $ADA_{\text{even}}$ ) and of the 7a.m. ( $ADA_{\text{morn}}$ ) samples as well as their difference ( $ADA_{\text{diff}(\text{even-morn})}$ ),  
170 were done using the Student's t-test, after conducting a permutation-based two-way ANOVA  
171 that found no group vs time interactions (**Table 1**). Comparisons between  $ADA_{\text{even}}$  and  
172  $ADA_{\text{morn}}$  levels within each group were carried out using paired t-test. The significance level  
173 for these tests was set at  $p < 0.05$ . Pearson's test was used to test correlations of ADA levels  
174 ( $ADA_{\text{even}}$ ,  $ADA_{\text{morn}}$  and  $ADA_{\text{diff}(\text{even-morn})}$ ) with duration of illness, positive symptom scores  
175 and negative symptom scores within the schizophrenia group. Spearman rank order  
176 correlation test was used for the within-group correlations between ADA levels and age. All  
177 the SAPS and SANS sub-scores (including their total scores) were included in the correlation  
178 analysis, and thus 11 correlations were made for each ADA level ( $ADA_{\text{even}}$ ,  $ADA_{\text{morn}}$  and

179 ADA<sub>diff(even-morn)</sub>). To exclude accidental significance associated with multiple correlations, a  
180 threshold value of 0.735 was set for the absolute correlation co-efficients ( $\alpha=0.05$ ;  $n=11$ )  
181 using G\*power 3.1 software (Faul et al., 2009, 2007) in order to obtain a statistical power  
182 greater than 80% (Sabri et al., 1997). All tests were assessed using two-tailed p values.

### 183 3. Results

184 In the two-way ANOVA, significant main effects were noted only for the group factor, while  
185 there were no time effects or group x time interactions (**Table 1**). On further exploring the  
186 group difference, patients with schizophrenia showed significantly higher ADA<sub>even</sub> (**Fig.1A**;  
187  $t=2.66$ ,  $p=0.013$ ) and ADA<sub>morn</sub> (**Fig.1B**;  $t=3.79$ ,  $p<0.001$ ) levels, when compared to healthy  
188 comparison subjects. ADA<sub>even</sub> and ADA<sub>morn</sub> showed significant correlation in both HS  
189 ( $n=17$  pairs,  $r=0.706$ ,  $p=0.002$ ) and SZ ( $n=11$  pairs,  $r=0.760$ ,  $p=0.007$ ) groups. ADA<sub>even</sub>  
190 appeared to be higher than ADA<sub>morn</sub> in both SZ (meanADA<sub>even</sub>=15.38ng/mL, SD=9.13,  $n=11$ ;  
191 meanADA<sub>morn</sub>=14.08ng/mL, SD=5,  $n=16$ ), and HS (meanADA<sub>even</sub>=8.85 ng/mL, SD=6.10,  
192  $n=17$ ; meanADA<sub>morn</sub>=7.16ng/mL; SD=4.18,  $n=18$ ). But the paired t-test did not find  
193 significant difference between ADA<sub>even</sub> and ADA<sub>morn</sub> in both HS ( $t=1.43$ ,  $p=0.1712$ ) and SZ  
194 ( $t=0.368$ ,  $p=0.7203$ ). We performed correlational analyses between ADA levels and SANS  
195 and SAPS sub-scores to explore the relationship, if any, between symptom severity and ADA  
196 levels (**Table 2**). A significant positive correlation was noted between ADA<sub>diff(even-morn)</sub> and  
197 hallucination sub-score of SAPS (**Fig.2B**;  $n=11$  pairs,  $r=0.810$ ,  $p=0.003$ ) at the a-priori-  
198 decided significance threshold to account for multiple comparisons (see Statistical analysis  
199 subsection). However, there was a high negative correlation nearing significance between  
200 ADA<sub>diff(even-morn)</sub> and avolition-apathy sub-score of SANS (**Fig.2C**;  $n=11$  pairs,  $r=-0.717$ ,  
201  $p=0.013$ ). A positive trend was observed between ADA<sub>even</sub> and hallucination sub-score of  
202 SAPS ( $n=11$  pairs,  $r=0.601$ ,  $p=0.050$ ) while ADA<sub>morn</sub> showed a trend for a positive correlation  
203 with avolition-apathy sub-score of SANS ( $n=16$  pairs,  $r=0.500$ ,  $p=0.049$ ).

204 ADA levels were not found to be significantly correlated with age in HS (ADA<sub>even</sub>:  
205  $n=17$  pairs,  $r=-0.092$ ,  $p=0.727$ ; ADA<sub>morn</sub>:  $n=18$  pairs,  $r=-0.363$ ,  $p=0.139$ ) and in SZ (ADA<sub>even</sub>:  
206  $n=11$  pairs,  $r=0.097$ ,  $p=0.777$ ; ADA<sub>morn</sub>:  $n=16$  pairs,  $r=-0.190$ ,  $p=0.481$ ). ADA levels were also  
207 not significantly correlated with duration of illness in the SZ (ADA<sub>even</sub>:  $n=11$  pairs,  $r=-0.044$ ,  
208  $p=0.897$ ; ADA<sub>morn</sub>:  $n=16$  pairs,  $r=-0.047$ ,  $p=0.862$ ).

### 209 4. Discussion

210 The present study found significantly higher serum ADA levels at two different time points  
211 (7p.m. on day1 and 7a.m. on day2) in patients with recent-onset schizophrenia who had never  
212 been exposed to neuroleptic medications, in comparison to matched healthy comparison  
213 subjects. The study also provides evidence for a link between ADA levels and  
214 psychopathology in patients with schizophrenia.

215 As described in the Introduction, similar observations have been reported in medicated  
216 patients with chronic schizophrenia (Brunstein et al., 2007; Ghaleiha et al., 2011). The results  
217 of our study on neuroleptic-naïve patients with recent-onset schizophrenia provide the initial  
218 evidence towards considering increased serum ADA as a potential peripheral marker of a  
219 hypoadenosinergic state in schizophrenia (Lara et al., 2006), and not just a secondary effect  
220 of illness chronicity or neuroleptic treatment (Brunstein et al., 2007; Ghaleiha et al., 2011).

221 The higher ADA levels in patients would imply faster and greater degradation of adenosine,  
222 leading to a hypoadenosinergic state. Adenosine inhibits the release of several  
223 neurotransmitters, such as glutamate, dopamine, serotonin and acetylcholine, and decreases  
224 neuronal activity by post-synaptic hyperpolarization, thereby serving an important  
225 neuromodulatory function (Lara et al., 2006). Animal models with altered adenosine  
226 signaling have provided important insights into the adenosine dependent changes in  
227 neurotransmitter signaling associated with the genesis of schizophrenia (Ferré, 1997; Lara,  
228 2002; Sills et al., 1999). Thus the increased ADA levels observed in our study could be the  
229 marker of an adenosine deficit state, which results in impaired neuromodulation in multiple  
230 brain networks leading on to the various symptoms of schizophrenia. Further support to the  
231 adenosine hypothesis of schizophrenia comes from a genetic study (Dutra et al., 2010) that  
232 has reported a lower proportion of ADA genotype with reduced activity (G/A) among  
233 patients with schizophrenia.

234 Though, as a group, patients with schizophrenia had significantly higher ADA at both time  
235 points, there was indeed wide variability of ADA values within and between the two time  
236 points (**Fig. 1B**). This might reflect the within-group differences in severity of the various  
237 psychopathological dimensions. Interestingly we found a significant positive correlation  
238 between  $ADA_{\text{diff}(\text{even-morn})}$  and auditory hallucinations and a trend towards an inverse  
239 correlation between  $ADA_{\text{diff}(\text{even-morn})}$  and avolition-apathy. The positive correlation between  
240 higher  $ADA_{\text{even}}$  (relative to  $ADA_{\text{morn}}$ ) and auditory hallucinations (**Fig. 2A and 2B**) might  
241 reflect the inhibitory deficit in the fronto-temporo-parietal networks associated with  
242 hyperglutamatergia (Schobel et al., 2013; Théberge et al., 2002) and hyperdopaminergia  
243 (Heinz and Schlagenhauf, 2010) secondary to a hypoadenosinergic state (Lara et al., 2006)  
244 during the day. Similarly, the positive correlation between higher  $ADA_{\text{morn}}$  (relative to  
245  $ADA_{\text{even}}$ ) and avolition-apathy (**Fig. 2A and 2C**) might reflect the hypoadenosinergic state  
246 during night causing disrupted sleep, leading on to lethargy and avolition during day time.  
247 These findings would therefore provide additional support to the possibility of a  
248 hypoadenosinergic state (Boison, 2011; Lara et al., 2006) mediating the predominant  
249 symptom dimensions of schizophrenia.

250 As mentioned in the Introduction, adenosine deaminase (ADA) is primarily responsible for  
251 catalyzing the irreversible deamination of adenosine to inosine. At least two isoenzymes of  
252 ADA viz., ADA1 and ADA2 are identified in humans (Ratech et al., 1981). While these  
253 isoenzymes are present in several tissues, they differ in their kinetic properties and tissue  
254 distribution. ADA1 is mostly intracellular or on the cell membrane in the ecto-form, attached  
255 to dipeptidyl peptidase 4 (Fan et al., 2012). On the other hand, ADA2 is the main isoenzyme  
256 in the serum. While ADA1 is expressed in lymphocytes and macrophages, ADA2 is more  
257 abundant in the blood, brain and liver (Rosemberg et al., 2007). Previous studies cited earlier  
258 (e.g., Brunstein et al., 2007; Ghaleiha et al., 2011) have also assayed serum levels of ADA as  
259 a surrogate marker for ADA levels in the brain.

260 It is pertinent to mention at this juncture that adenosine and other nucleosides are transported  
261 across the blood-brain barrier via a saturable, carrier mediated mechanism (Kalaria and  
262 Harik, 1988). The increased ADA activity in the periphery, as seen in patients with drug  
263 naïve schizophrenia, may result in reduction of the circulatory levels of adenosine. This may  
264 decrease the transport across the blood-brain barrier (BBB) leading to a hypoadenosinergic

265 state in the CNS. However, this speculation requires confirmation with additional  
266 experiments involving the quantitation of adenosine and its metabolites (inosine,  
267 hypoxanthine) in serum and CSF by HPLC method and measuring the isoform specific  
268 enzyme activity in the serum and CSF.

269 It may be argued that the higher ADA found in our patient sample may be a compensatory  
270 phenomenon secondary to a state-dependent increase in brain adenosine levels during the  
271 psychotic state (Cunha and Cunha, 2001; Hirayama et al., 2011; Reddy et al., 1992).  
272 However, this argument fails to explain the overall ADA rise noted even among patients with  
273 the negative symptom of avolition-apathy. As our patient group comprised of subjects with  
274 heterogeneous symptom dimensions (**Fig. 2A**), it is unlikely that the higher ADA could have  
275 exclusively resulted from higher state-dependent adenosine levels. Thus, the increased ADA  
276 levels detected in our sample of patients with schizophrenia may be considered as a  
277 peripheral marker of a hypoadenosinergic state that characterizes the disorder. Similarly,  
278 medication induced elevation of serum ADA reported by Ghaleiha et al. (2011) in patients  
279 with schizophrenia could be compensatory to an improvement in adenosinergic tone  
280 associated with successful treatment. It has to be stated that these are indeed preliminary  
281 hypotheses generated from the results of the study, which need to be tested in future studies  
282 with larger sample sizes.

283 Adenosine has been shown to serve a regulatory function in the immune system of brain  
284 (Haskó et al., 2005). Though general immunological disorders were ruled out in all our  
285 subjects through careful history and routine clinical hematological and biochemical screening  
286 investigations, we did not carry out screening blood investigations to rule out autoimmune  
287 conditions. Although remote associations between acute psychotic states, encephalitis and  
288 NMDA auto-antibodies have been reported (Deakin et al., 2014), schizophrenia has not been  
289 conclusively shown to be an autoimmune disorder (Coutinho et al., 2014). Therefore, it is  
290 unlikely that the raised ADA levels observed in our sample of patients with schizophrenia  
291 could be secondary to an autoimmune state.

292 A potential limitation of the study is the fact that only protein levels of ADA in serum were  
293 measured, while enzymatic activity of ADA was not assayed. While measuring the enzyme  
294 activity offers greater correlation with physiological response, the practical difficulties in  
295 handling the samples prompted us to measure the ADA protein levels. In our earlier pilot  
296 studies, we observed a gradual decrease in the ADA enzyme activity when the serum samples  
297 were stored at 4°C or when subjected to two freeze-thaw cycles. However, as expected, the  
298 ADA protein content remained unaltered upon storage/ freeze thawing. The present study  
299 involved the recruitment of drug naïve subjects with schizophrenia over a substantial time  
300 period. The samples were collected as and when the subjects were recruited and the serum  
301 separated and stored. To avoid inter-assay variation, all the samples were analyzed at the  
302 same time. In order to avoid any bias in the results due to varying lengths of sample storage,  
303 it was considered appropriate to measure the protein content. Moreover, ADA also has  
304 significant non-enzymatic actions (protein-protein interactions) with respect to desensitizing  
305 and enhancing functionality of adenosine receptors (Ciruela et al., 2010; Gracia et al., 2008).  
306 Therefore, a protein level assessment may be a better indicator of the full range of ADA  
307 activity in comparison to enzyme activity.



308 Finally, in our limited sample of neuroleptic-naïve patients with recent-onset schizophrenia  
309 and matched healthy comparison subjects, all the genotyped subjects (HS=16; SZ=16) were  
310 found to have G/G genotype of the ADA 22G>A polymorphism (rs73598374); none of the  
311 subjects had the G/A genotype that is associated with lower ADA activity (Bachmann et al.,  
312 2012; Battistuzzi et al., 1981). Larger samples of schizophrenia and healthy subjects may be  
313 needed to observe between-group differences, if any, of the G/G and G/A genotypes as  
314 reported in one previous study (Dutra et al., 2010). Nevertheless, since all our subjects were  
315 homogeneous with respect to the ADA 22G>A functional polymorphic variation, it may be  
316 inferred that our observation of higher serum ADA levels in patients with schizophrenia is  
317 unlikely to be confounded by genotypic variation between the study samples.

## 318 **5. Conclusion**

319 To the best of our knowledge, this is the first report of elevated serum ADA levels at two  
320 time points in neuroleptic-naïve patients with recent-onset schizophrenia. Further, the study  
321 also provides preliminary evidence for a link between ADA levels at different time points  
322 with positive and negative symptoms of schizophrenia. These findings may be considered  
323 strong evidences in support of the adenosine hypothesis of schizophrenia. In the background  
324 of previous reports suggesting a possible genetic basis for the elevated ADA activity in  
325 schizophrenia and the observation of alteration of ADA levels with successful treatment, the  
326 potential utility of serum ADA levels as a biomarker or endophenotype of schizophrenia  
327 should be researched in future studies.

## 328 **6. Acknowledgments:**

329 We would like to thank Mrs. Ammu Lukose (for recruitment and evaluation of subjects), Dr.  
330 Mathew John (for serum extraction and storage), Dr. Meera Purushottam (for genetic  
331 analysis), and all the participants who devoted their time and efforts to take part in this study.  
332 This work was funded in part by Department of Biotechnology (DBT), Government of India  
333 (Grant No. BT/PR/8363/MED/14/1252 & DST/CSI/100/1321 to J.P.J), and Department of  
334 Science & Technology (DST), Government of India (Grant No. SR/SO/BB-27/2009 to S.S.).

## 335 **7. Funding:**

336 This work was funded in part by Department of Biotechnology (DBT), Government of India  
337 (Grant No. BT/PR/8363/MED/14/1252 & DST/SR/CSI/79/2010 to J.P.J), and Department of  
338 Science & Technology (DST), Government of India (Grant No. SR/SO/BB-27/2009 to S.S.).

## 339 **8. Contributors**

340 A.S and S.K. carried out the data acquisition and analysis; A.S., S.K., B.M.K. and J.P.J.  
341 conceptualized the study; M.P. helped with statistical analysis; S.S. facilitated the ADA  
342 assessments; S.J. facilitated the Genetic assessments; B.M.K. and J.P.J. critically evaluated  
343 the study; A.S and J.P.J. wrote the manuscript and all other authors contributed to writing the  
344 manuscript.

345

## 346 **References**

- 347 Al-Rubaye, F.G., Morad, T.S., 2012. Serum Adenosine Deaminase Activity in Iraqi patients  
348 with Breast Cancer on tamoxifen therapy. *Gaziantep Med. J.* 18, 1. doi:10.5455/GMJ-  
349 30-2012-96
- 350 Al-Rubaye, F.G., Morad, T.S., 2013. Purine metabolism and oxidative stress in children with  
351 autistic spectrum disorders. *J Exp Integr Med* 3, 293–297.
- 352 American Psychiatric Association, 2000. Diagnostic and statistical manual of mental  
353 disorders DSM-IV-TR fourth edition (text revision). American Psychiatric Publishing,  
354 Inc., Washington, DC.
- 355 Andreasen, N.C., 1983. Scale for the Assessment of Positive Symptoms (SANS). The  
356 University of Iowa, Iowa City, Iowa.
- 357 Andreasen, N.C., 1982. Negative symptoms in schizophrenia. Definition and reliability.  
358 *Arch. Gen. Psychiatry* 39, 784–788. doi:10.1001/archpsyc.1982.04290070020005
- 359 Bachmann, V., Klaus, F., Bodenmann, S., Schäfer, N., Brugger, P., Huber, S., Berger, W.,  
360 Landolt, H.P., 2012. Functional ADA polymorphism increases sleep depth and reduces  
361 vigilant attention in humans. *Cereb. Cortex* 22, 962–970. doi:10.1093/cercor/bhr173
- 362 Battistuzzi, G., Iudicone, P., Santolamazza, P., Petrucci, R., 1981. Activity of adenosine  
363 deaminase allelic forms in intact erythrocytes and in lymphocytes. *Ann. Hum. Genet.*  
364 45, 15–19.
- 365 Boison, D., 2011. Modulators of nucleoside metabolism in the therapy of brain diseases.  
366 *Curr. Top. Med. Chem.* 11, 1068–1086. doi:10.2174/156802611795347609
- 367 Boison, D., 2008. Adenosine as a neuromodulator in neurological diseases. *Curr. Opin.*  
368 *Pharmacol.* 8, 2–7. doi:10.1016/j.coph.2007.09.002
- 369 Brunstein, M.G., Silveira, E.M., Chaves, L.S., Machado, H., Schenkel, O., Belmonte-de-  
370 Abreu, P., Souza, D.O., Lara, D.R., 2007. Increased serum adenosine deaminase activity  
371 in schizophrenic receiving antipsychotic treatment. *Neurosci. Lett.* 414, 61–64.  
372 doi:10.1016/j.neulet.2006.11.071
- 373 Carlsson, a, 1988. The current status of the dopamine hypothesis of schizophrenia.  
374 *Neuropsychopharmacology* 1, 179–186. doi:10.1016/0893-133X(88)90012-7
- 375 Ciruela, F., Albergaria, C., Soriano, A., Cuffí, L., Carbonell, L., Sánchez, S., Gandía, J.,  
376 Fernández-Dueñas, V., 2010. Adenosine receptors interacting proteins (ARIPs): Behind  
377 the biology of adenosine signaling. *Biochim. Biophys. Acta - Biomembr.* 1798, 9–20.  
378 doi:10.1016/j.bbamem.2009.10.016
- 379 Coutinho, E., Harrison, P., Vincent, A., 2014. Do neuronal autoantibodies cause psychosis? a  
380 neuroimmunological perspective. *Biol. Psychiatry* 75, 269–275.  
381 doi:10.1016/j.biopsych.2013.07.040
- 382 Coyle, J.T., 2006. Glutamate and schizophrenia: beyond the dopamine hypothesis. *Cell. Mol.*  
383 *Neurobiol.* 26, 365–384. doi:10.1007/s10571-006-9062-8
- 384 Cunha, R., Cunha, R. a, 2001. Adenosine as a neuromodulator and as a homeostatic regulator  
385 in the nervous system: different roles, different sources and different receptors.  
386 *Neurochem. Int.* 38, 107–125.
- 387 Deakin, J., Lennox, B.R., Zandi, M.S., 2014. Antibodies to the N-methyl-D-aspartate  
388 receptor and other synaptic proteins in psychosis. *Biol. Psychiatry* 75, 284–291.  
389 doi:10.1016/j.biopsych.2013.07.018
- 390 Dutra, G.P., Ottoni, G.L., Lara, D.R., Bogo, M.R., 2010. Lower frequency of the low activity  
391 adenosine deaminase allelic variant (ADA1\*2) in schizophrenic patients. *Rev. Bras.*

- 392 Psiquiatr. 32, 275–278. doi:10.1590/S1516-44462010005000003
- 393 Elgün, S., Keskinoglu, A., Kumbasar, H., 1999. Dipeptidyl peptidase IV and adenosine  
394 deaminase activity. Decrease in depression. *Psychoneuroendocrinology* 24, 823–832.
- 395 Fan, H., Tansi, F.L., Weihofen, W.A., Bottcher, C., Hu, J., Martinez, J., Saenger, W., Reutter,  
396 W., 2012. Molecular mechanism and structural basis of interactions of dipeptidyl  
397 peptidase IV with adenosine deaminase and human immunodeficiency virus type-1  
398 transcription transactivator. *Eur. J. Cell. Biol.* 91, 265-273. doi:  
399 10.1016/j.ejcb.2011.06.001.
- 400 Faul, F., Erdfelder, E., Buchner, A., Lang, A., 2009. Statistical power analyses using  
401 G\*Power 3.1: tests for correlation and regression analyses. *Behav. Res. Methods* 41,  
402 1149–1160. doi:10.3758/BRM.41.4.1149
- 403 Faul, F., Erdfelder, E., Lang, A., Buchner, A., 2007. G\*Power 3: a flexible statistical power  
404 analysis program for the social, behavioral, and biomedical sciences. *Behav. Res.*  
405 *Methods* 39, 175–191. doi:10.3758/BF03193146
- 406 Ferré, S., 1997. Adenosine-dopamine interactions in the ventral striatum. Implications for the  
407 treatment of schizophrenia. *Psychopharmacology (Berl)*. 133, 107–120.  
408 doi:10.1007/s002130050380
- 409 Franco, R., Casadó, V., Ciruela, F., Saura, C., Mallol, J., Canela, E.I., Lluís, C., 1997. Cell  
410 surface adenosine deaminase: Much more than an ectoenzyme. *Prog. Neurobiol.* 52,  
411 283–294. doi:10.1016/S0301-0082(97)00013-0
- 412 Ghaleiha, A., Honarbakhsh, N., Boroumand, M.A., Jafarinia, M., Tabrizi, M., Rezaei, F.,  
413 Raznahan, M., Akhondzadeh, S., 2011. Correlation of adenosinergic activity with  
414 superior efficacy of clozapine for treatment of chronic schizophrenia: A double blind  
415 randomised trial. *Hum. Psychopharmacol.* 26, 120–124. doi:10.1002/hup.1176
- 416 Gonzalez-Burgos, G., Lewis, D. a., 2008. GABA neurons and the mechanisms of network  
417 oscillations: Implications for understanding cortical dysfunction in schizophrenia.  
418 *Schizophr. Bull.* 34, 944–961. doi:10.1093/schbul/sbn070
- 419 Gracia, E., Cortes, A., Meana, J.J., Garcia-Sevilla, J., Herhsfield, M.S., Canela, E.I., Mallol,  
420 J., Lluís, C., Franco, R., Casado, V., 2008. Human adenosine deaminase as an allosteric  
421 modulator of human A(1) adenosine receptor: abolishment of negative cooperativity for  
422 [H](R)-pia binding to the caudate nucleus. *J. Neurochem.* 107, 161–170.
- 423 Haskó, G., Pacher, P., Vizi, E.S., Illes, P., 2005. Adenosine receptor signaling in the brain  
424 immune system. *Trends Pharmacol. Sci.* 26, 511–516. doi:10.1016/j.tips.2005.08.004
- 425 Heinz, A., Schlagenhauf, F., 2010. Dopaminergic dysfunction in schizophrenia: Salience  
426 attribution revisited. *Schizophr. Bull.* 36, 472–485. doi:10.1093/schbul/sbq031
- 427 Herken, H., Gurel, A., Selek, S., Armutcu, F., Ozen, M.E., Bulut, M., Kap, O., Yumru, M.,  
428 Savas, H.A., Akyol, O., 2007. Adenosine Deaminase, Nitric Oxide, Superoxide  
429 Dismutase, and Xanthine Oxidase in Patients with Major Depression: Impact of  
430 Antidepressant Treatment. *Arch. Med. Res.* 38, 247–252.  
431 doi:10.1016/j.arcmed.2006.10.005
- 432 Hirayama, M., Nakamura, T., Watanabe, H., Uchida, K., Hama, T., Hara, T., Niimi, Y., Ito,  
433 M., Ohno, K., Sobue, G., 2011. Urinary 8-hydroxydeoxyguanosine correlate with  
434 hallucinations rather than motor symptoms in Parkinson’s disease. *Park. Relat. Disord.*  
435 17, 46–49. doi:10.1016/j.parkreldis.2010.11.004
- 436 Kalaria, R.N., Harik, S.I., 1988. Adenosine receptors and the nucleoside transporter in human  
437 brain vasculature. *J. Cereb. Blood Flow Metab.* 8, 32-39.
- 438 Keshavan, M.S., Nasrallah, H.A., Tandon, R., 2011. Schizophrenia, “Just the Facts” 6.

- 439 Moving ahead with the schizophrenia concept: From the elephant to the mouse.  
440 Schizophr. Res. 127, 3–13. doi:10.1016/j.schres.2011.01.011
- 441 Lara, D.R., 2002. Inhibitory deficit in schizophrenia is not necessarily a GABAergic deficit.  
442 Cell. Mol. Neurobiol. 22, 239–247. doi:10.1023/A:1020759615977
- 443 Lara, D.R., Dall’Igna, O.P., Ghisolfi, E.S., Brunstein, M.G., 2006. Involvement of adenosine  
444 in the neurobiology of schizophrenia and its therapeutic implications. Prog. Neuro-  
445 Psychopharmacology Biol. Psychiatry 30, 617–629. doi:10.1016/j.pnpbp.2006.02.002
- 446
- 447 Meltzer, H.Y., Massey, B.W., 2011. The role of serotonin receptors in the action of atypical  
448 antipsychotic drugs. Curr. Opin. Pharmacol. 11, 59–67. doi:10.1016/j.coph.2011.02.007
- 449 Ratech, H., Thorbecke, G.J., Meredith, G., Hirschhorn, R., 1981. Comparison and possible  
450 homology of isoenzymes of adenosine deaminase in Aves and humans. Enzyme 26, 74-  
451 84.
- 452 Reddy, P.L., Khanna, S., Subhash, M.N., Channabasavanna, S.M., Rao, B.S., 1992. CSF  
453 amine metabolites in depression. Biol. Psychiatry 31, 112–118. doi:10.1016/0006-  
454 3223(92)90198-9
- 455 Rosemberg, D.B., Rico, E.P., Guidoti, M.R., Dias, R.D., Souza, D.O., Bonan, C.D., Bogo,  
456 M.R., 2007. Adenosine deaminase-related genes: Molecular identification, tissue  
457 expression pattern and truncated alternative splice isoform in adult zebrafish (*Danio*  
458 *rerio*). Life Sci. 81, 1526-1534.
- 459 Sabri, O., Erkwoh, R., Schreckenberger, M., Owega, A., Sass, H., Buell, U., 1997.  
460 Correlation of positive symptoms exclusively to hyperperfusion or hypoperfusion of  
461 cerebral cortex in never-treated schizophrenics. Lancet 349, 1735–1739.  
462 doi:10.1016/S0140-6736(96)08380-8
- 463 Schobel, S. a., Chaudhury, N.H., Khan, U. a., Paniagua, B., Styner, M. a., Asllani, I., Inbar,  
464 B.P., Corcoran, C.M., Lieberman, J. a., Moore, H., Small, S. a., 2013. Imaging Patients  
465 with Psychosis and a Mouse Model Establishes a Spreading Pattern of Hippocampal  
466 Dysfunction and Implicates Glutamate as a Driver. Neuron 78, 81–93.  
467 doi:10.1016/j.neuron.2013.02.011
- 468 SEB390Hu-96 ELISA Kit for Adenosine Deaminase (ADA) - Instruction manual [WWW  
469 Document], 2012. URL [http://www.uscnk.com/manual/ELISA-Kit-for-Adenosine-  
470 Deaminase-\(ADA\)-E91390Hu.pdf](http://www.uscnk.com/manual/ELISA-Kit-for-Adenosine-Deaminase-(ADA)-E91390Hu.pdf)
- 471 Sheehan, D. V., Lecrubier, Y., Sheehan, K.H., Amorim, P., Janavs, J., Weiller, E., Hergueta,  
472 T., Baker, R., Dunbar, G.C., 1998. The Mini-International Neuropsychiatric Interview  
473 (M.I.N.I.): The development and validation of a structured diagnostic psychiatric  
474 interview for DSM-IV and ICD-10. J. Clin. Psychiatry 59, 22–33. doi:10.1016/S0924-  
475 9338(99)80239-9
- 476 Sills, T.L., Azampanah, A., Fletcher, P.J., 1999. The adenosine A1 receptor agonist N6-  
477 cyclopentyladenosine blocks the disruptive effect of phencyclidine on prepulse  
478 inhibition of the acoustic startle response in the rat. Eur. J. Pharmacol. 369, 325–329.  
479 doi:10.1016/S0014-2999(99)00088-6
- 480 Stubbs, G., Litt, M., Lis, E., Jackson, R., Voth, W., Lindberg, a, Litt, R., 1982. Adenosine  
481 deaminase activity decreased in autism. J. Am. Acad. Child Psychiatry 21, 71–74.  
482 doi:10.1097/00004583-198201000-00012
- 483 Théberge, J., Bartha, R., Drost, D.J., Menon, R.S., Malla, A., Takhar, J., Neufeld, R.W.,  
484 Rogers, J., Pavlosky, W., Schaefer, B., Densmore, M., Al-Semaan, Y., Williamson, P.C.,  
485 2002. Glutamate and glutamine measured with 4.0 T proton MRS in never-treated  
486 patients with schizophrenia and healthy volunteers. Am. J. Psychiatry 159, 1944–1946.

487           doi:10.1176/appi.ajp.159.11.1944

488

489   Yegutkin, G.G., 2008. Nucleotide- and nucleoside-converting ectoenzymes: Important  
490   modulators of purinergic signalling cascade. *Biochim. Biophys. Acta - Mol. Cell Res.*  
491   1783, 673–694. doi:10.1016/j.bbamcr.2008.01.024

492

493 **Table 1: Two-way ANOVA of ADA levels between groups and sample collection times**

|                       | <b>CNT (n=17 pairs)</b> | <b>SCZ (n=11 pairs)</b> |                        |                                  |
|-----------------------|-------------------------|-------------------------|------------------------|----------------------------------|
| <b>Evening sample</b> | 0.862 (0.280)           | 1.129 (0.227)           | F=-2.782;<br>p=0.009   | <b>F=-28.671;<br/>p&lt;0.001</b> |
| <b>Morning sample</b> | 0.731 (0.240)           | 1.111 (0.243)           | F=-3.419;<br>p=0.002   |                                  |
|                       | F=0.787;p=0.432         | F=0.181;p=0.853         | <b>F=0.226;p=0.699</b> |                                  |
|                       | <b>F=0.650;p=0.528</b>  |                         |                        |                                  |

494 **NOTE:** Permutation-based two-way ANOVA was used with 10,000 re-samples on log-  
 495 transformed serum ADA levels. Mean (SD) values are given in the central white cells. Outer  
 496 dark grey cells show the F- and p-values. Note that significant main effects exist only for  
 497 group factor, and no interaction effect is seen. CNT – healthy controls; SCZ – patients with  
 498 schizophrenia.

499

500 **Table 2: Correlational analysis between ADA levels and symptom severity**

|                                | Scale for Assessment of Positive symptoms<br>(SAPS) |                 |                   |                                  |                 | Scale for Assessment of Negative symptoms<br>(SANS) |                  |                         |                  |                  |                  |
|--------------------------------|-----------------------------------------------------|-----------------|-------------------|----------------------------------|-----------------|-----------------------------------------------------|------------------|-------------------------|------------------|------------------|------------------|
|                                | Hallucinations                                      | Delusions       | Bizarre behaviour | Positive formal thought disorder | Total score     | Affective flattening                                | Alogia           | Avolition-apathy        | Anhedonia        | Attention        | Total score      |
| <b>ADA (Evening – Morning)</b> | <b>0.81</b><br>(0.003)                              | 0.18<br>(0.591) | -0.64<br>(0.035)  | -0.38<br>(0.250)                 | 0.22<br>(0.506) | -0.17<br>(0.623)                                    | -0.39<br>(0.240) | <b>-0.72</b><br>(0.013) | -0.49<br>(0.130) | -0.08<br>(0.819) | -0.41<br>(0.206) |
| <b>ADA (Evening)</b>           | 0.60<br>(0.050)                                     | 0.19<br>(0.580) | -0.38<br>(0.253)  | -0.25<br>(0.457)                 | 0.21<br>(0.530) | -0.09<br>(0.796)                                    | -0.09<br>(0.787) | 0.10<br>(0.767)         | -0.20<br>(0.547) | 0.10<br>(0.777)  | -0.07<br>(0.839) |
| <b>ADA (Morning)</b>           | 0.05<br>(0.878)                                     | 0.10<br>(0.772) | 0.02<br>(0.959)   | 0.04<br>(0.917)                  | 0.08<br>(0.807) | 0.07<br>(0.837)                                     | 0.20<br>(0.546)  | 0.60<br>(0.049)         | 0.17<br>(0.623)  | 0.14<br>(0.673)  | 0.25<br>(0.464)  |

**NOTE:** Pearson’s Correlation test (two-tailed) was performed between log-transformed ADA levels and scores of SAPS and SANS. All data shown as: Correlation coefficient (p-value). Significant correlation is shown in bold and highlighted in dark grey. Trend correlations are shown in italics and highlighted in light grey.

501

## 502 **Figure legends**

503 **Fig. 1: Serum levels of Adenosine deaminase (ADA).** Scatter plots showing serum ADA  
504 levels in: **A)** evening sample [control=17; schizophrenia=11], and **B)** morning sample  
505 [control=18; schizophrenia=16]. Unpaired t test performed between log transformed ADA  
506 values. \* $p < 0.05$ ; \*\*\* $p < 0.001$ .

507 **Fig. 2: Relation between Adenosine deaminase (ADA) levels and symptom severity. A)**  
508 Line graph and table showing the relation between relatively higher ADA levels in the  
509 evening samples (evening rise in ADA) or in the morning samples (morning rise in ADA),  
510 with symptom severity of patients with schizophrenia [n=11]. Note that patients with higher  
511 evening rise in ADA (shown in red) have higher hallucination scores, while those with higher  
512 morning rise in ADA (shown in blue) have higher avolition-apathy scores. Line graph  
513 showing the correlation of difference between evening and morning ADA levels versus: **B)**  
514 Scale for Assessment of Positive symptoms (SAPS) hallucination sub-score [n=11 pairs,  
515  $r = 0.8097$ ,  $p = 0.0025$ ], and **C)** Scale for Assessment of Negative symptoms (SANS) avolition-  
516 apathy sub-score [n=11 pairs,  $r = -0.7165$ ,  $p = 0.0131$ ]. Pearson's correlation test (two-tailed).  
517 \* $r > 0.735$  (see **Statistical Analysis section**).



**A****ADA Evening (ng/mL)**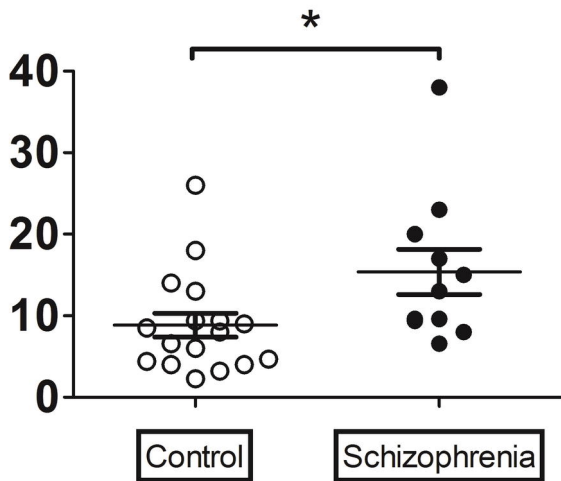**B****ADA Morning (ng/mL)**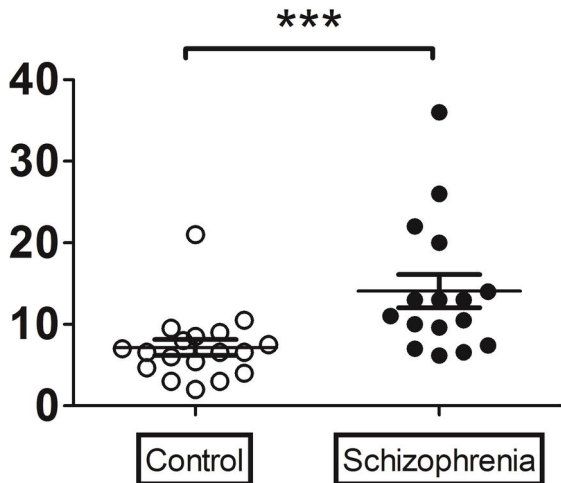

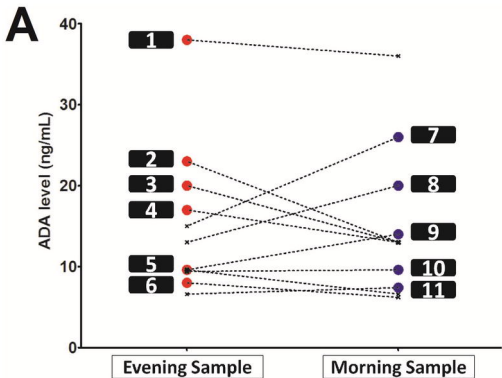

| Evening rise in ADA level |                             |                            |                               |
|---------------------------|-----------------------------|----------------------------|-------------------------------|
| Subject code              | ADA level (Evening) (ng/mL) | SAPS – Hallucination score | SANS – Avolition-Apathy score |
| 1                         | 38                          | 17                         | 12                            |
| 2                         | 23                          | 16                         | 12                            |
| 3                         | 20                          | 20                         | 6                             |
| 4                         | 17                          | 8                          | 13                            |
| 5                         | 9.6                         | 13                         | 8                             |
| 6                         | 8                           | 3                          | 9                             |

| Morning rise in ADA level |                             |                            |                               |
|---------------------------|-----------------------------|----------------------------|-------------------------------|
| Subject code              | ADA level (Morning) (ng/mL) | SAPS – Hallucination score | SANS – Avolition-Apathy score |
| 7                         | 26                          | 0                          | 20                            |
| 8                         | 20                          | 3                          | 18                            |
| 9                         | 14                          | 2                          | 20                            |
| 10                        | 9.6                         | 6                          | 11                            |
| 11                        | 7.4                         | 8                          | 7                             |

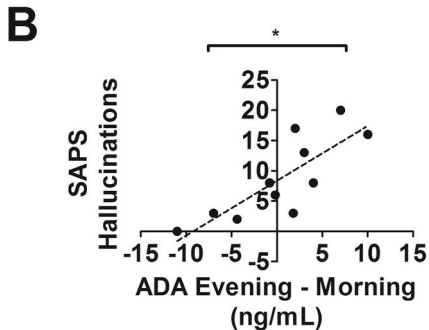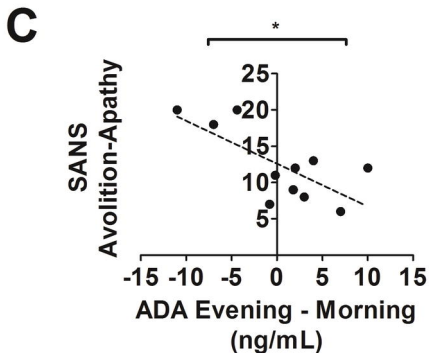

Source: http://biorxiv.org/content/10.1101/070748v1.full.pdf
